# Supplementary material for: Comparative Evaluation of Soluble and Insoluble-Bound Phenolics and Antioxidant Activity of Two Chinese Mistletoes
Source: PubMed Central journal article supplement (PMC6017001; doi:10.3390/molecules23020359), 2018-02-08
Supplement: molecules-23-00359-s001.pdf [file molecules-23-00359-s001.pdf]

# 1 Supplementary Material

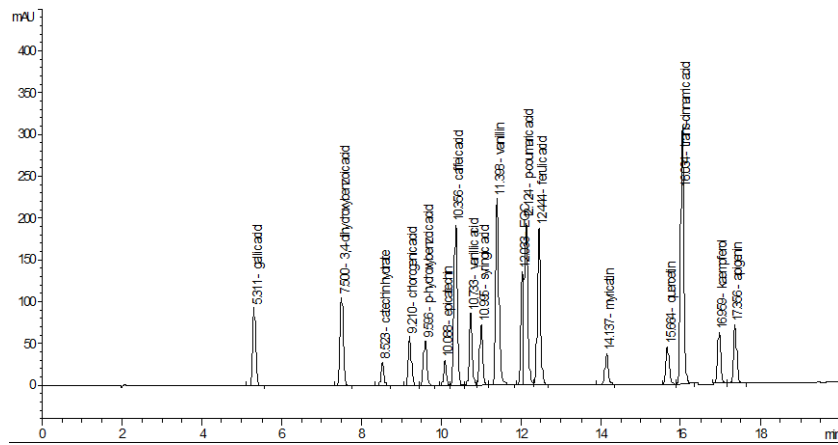

2

3

Figure 1S. HPLC chromatograms of 18 phenolic standard samples.

4

5
